# Supplementary material for: Serum Level of Tumor-Overexpressed AGR2 Is Significantly Associated with Unfavorable Prognosis of Canine Malignant Mammary Tumors
Source: MDPI journal article supplement (doi:10.3390/ani11102923), 2021-10-09
Supplement: s1 [file s1]

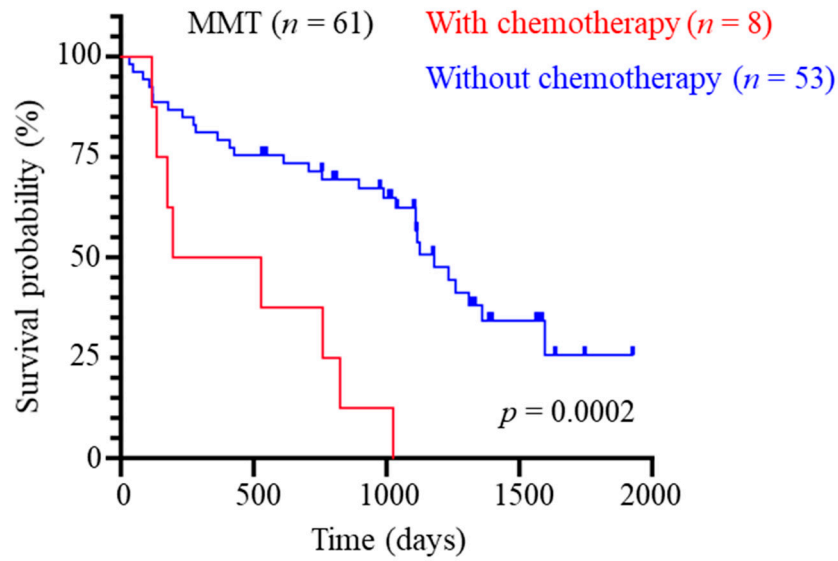

| Chemotherapy    | eAGR2 concentration ( $\mu\text{g/mL}$ ) |                     |
|-----------------|------------------------------------------|---------------------|
|                 | Mean $\pm$ SD                            | Median (range)      |
| Yes ( $n = 8$ ) | $7.99 \pm 3.53$                          | 8.58 (2.39 – 12.49) |
| No ( $n = 53$ ) | $5.53 \pm 2.78$                          | 4.91 (1.76 – 15.55) |

**Figure S1.** Comparison of overall survival between MMT dogs with and without chemotherapy after surgery. The Kaplan-Meier survival plot depicts differences in survival probability between the chemotherapy-administered and the chemotherapy-free groups in 61 MMT cases. Statistical significance was determined by the log-rank test. Data of serum eAGR2 concentration in two groups are shown in the bottom table.



(B)

Figure 3B

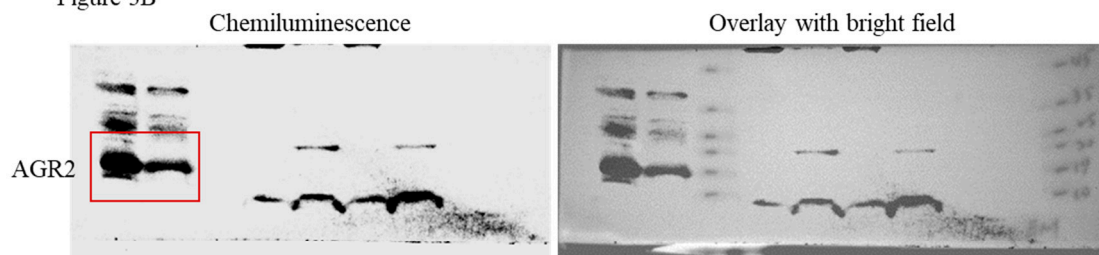

(C)

Figure 4B

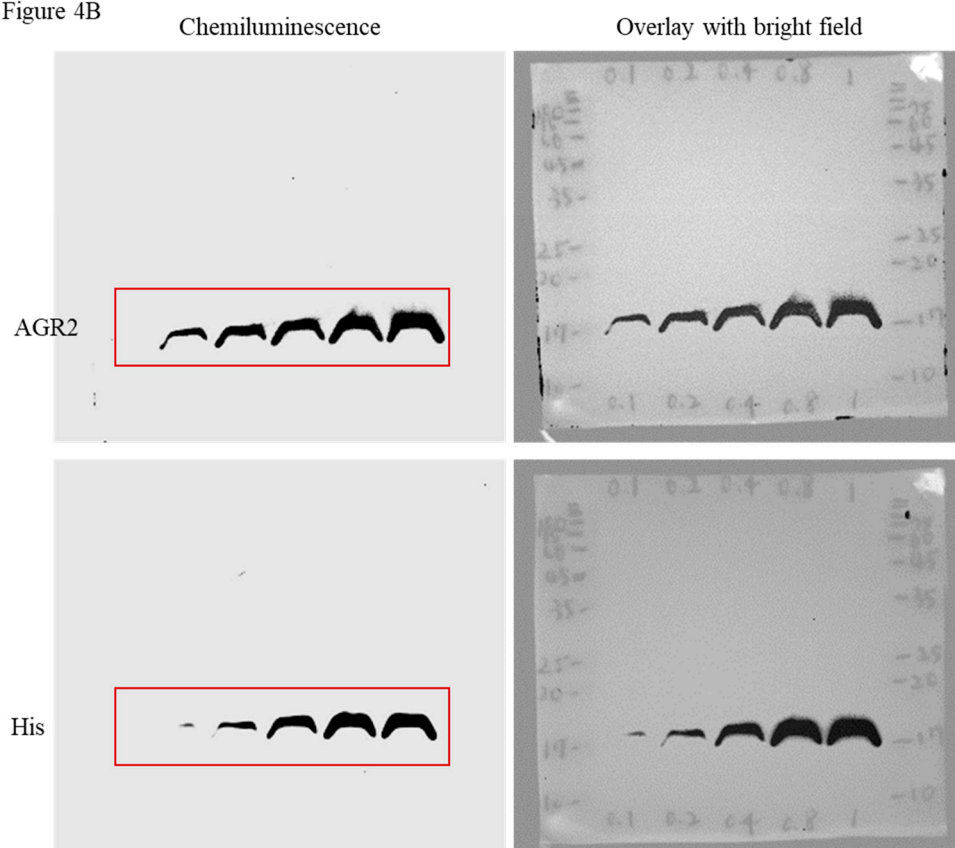

**Figure S2.** Original immunoblotting data in this study. (A) Figure 2A; (B) Figure 3B; (C) Figure 4B.
